# Supplementary material for: Regulatory T Cells Decreased during Recovery from Mild COVID-19
Source: MDPI journal article supplement (doi:10.3390/v14081688), 2022-07-30
Supplement: s1 [file s1]

## Supplementary

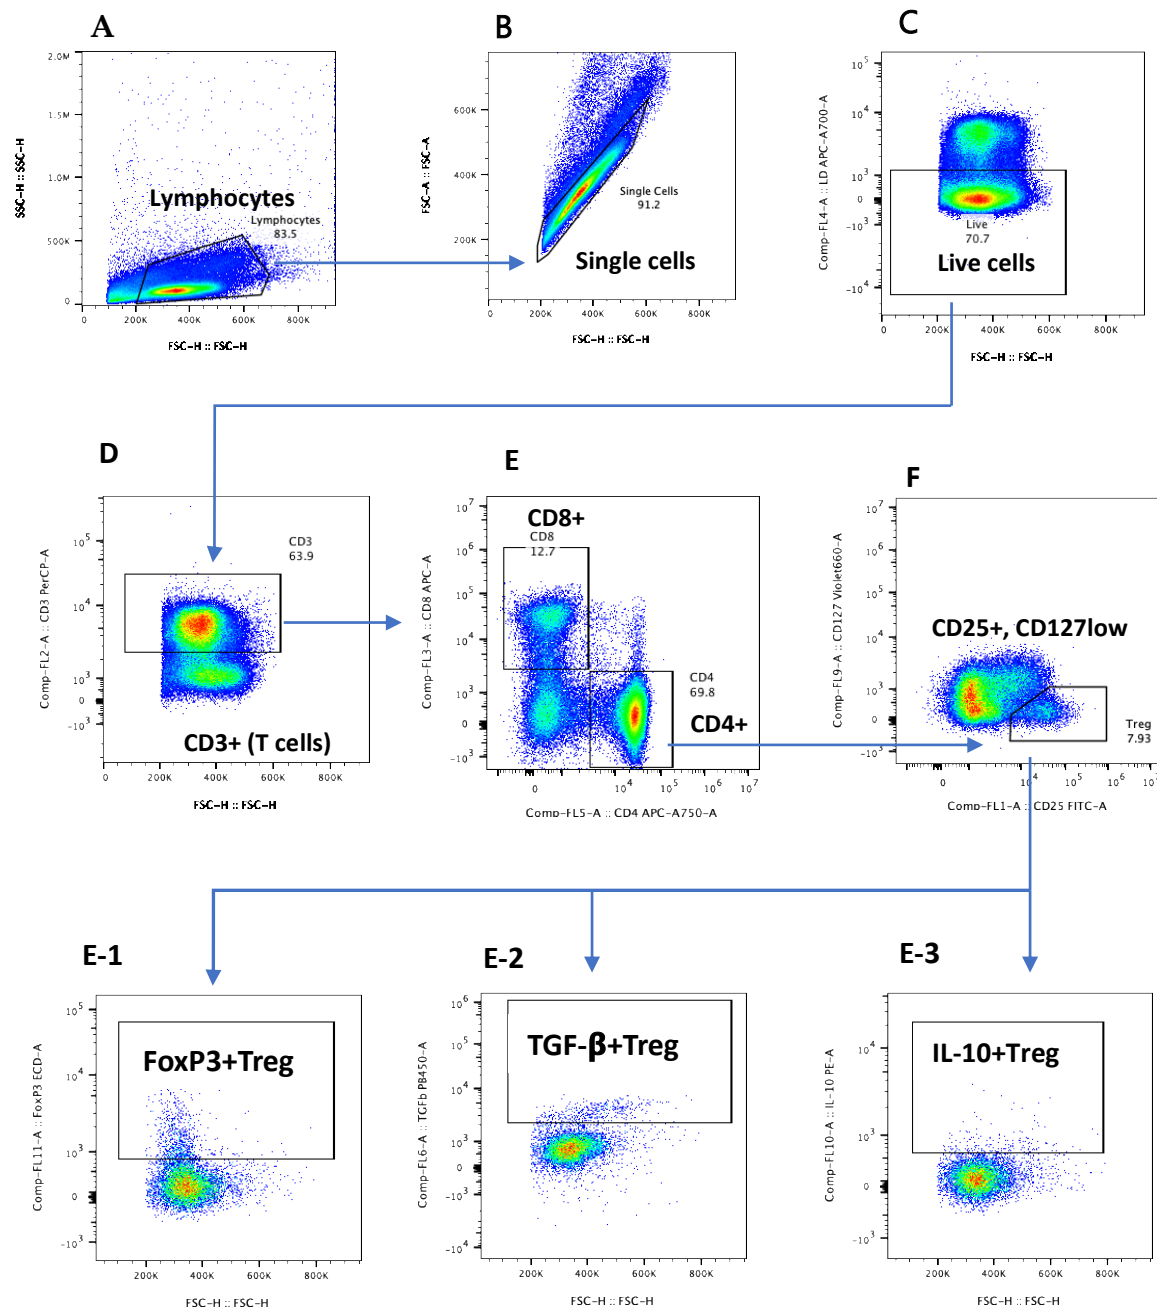

**Figure S1.** Gating strategy for finding Treg and cytokine producing Tregs. (A) All cells were identified as the lymphocytes by FSC-H and SSC-H. (B) Single lymphocytes were next selected from the panel. (C) Live cells presented next to the single cells panel. (D) Live cells were selected to identify T cells by CD3 positive population. (E) CD3 is a group of T cell which its subpopulation included of CD8 and CD4. (F) Tregs is a subpopulation of CD4+ identified by CD25+ and CD127 low as the surface markers. (E-1) were gated to identify Tregs' transcriptional factor FoxP3. (E-2) and (E-3) were demonstrated the cytokine producing Tregs, TGF- $\beta$  and IL-10, respectively.

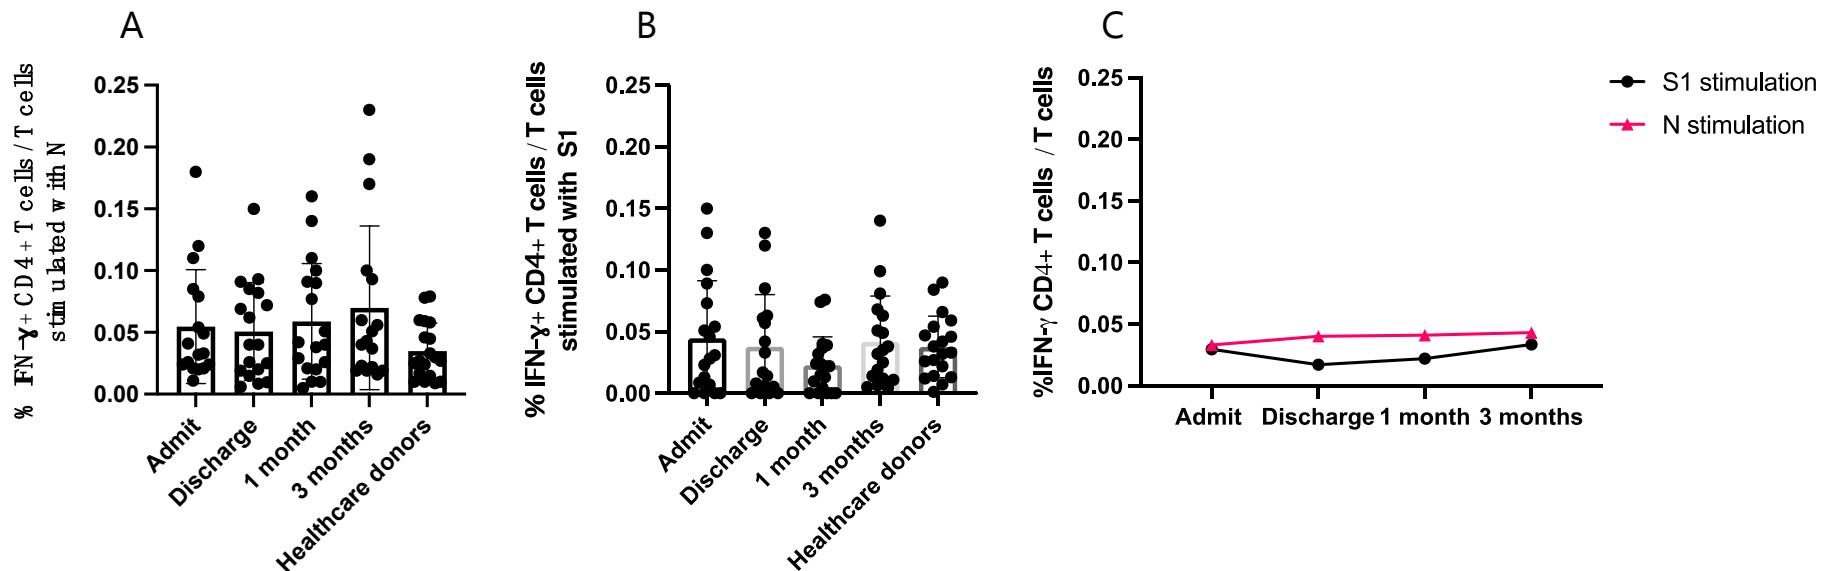

**Figure S2.** IFN- $\gamma$ + CD4+ T-cell responses in COVID-19 patients. (A) and (B) are the percentage of IFN- $\gamma$ + CD4+ T cells in T-cell population stimulated by SARS-CoV-2 N and S1 peptides. (C) Percentage IFN- $\gamma$ + CD4+ T cells in T-cell population in the form of kinetic change. The results are presented as median with 95% CI. Statistical significance of differences between groups was determined using Kruskal–Wallis, followed by Dunn’s multiple comparison test.

**Supplementary Table S1.** Fluorochrome conjugated antibodies for flow cytometry analysis.

| Antibody      | Fluorochrome | Dilution | Clone      | Cat no. | Source        |
|---------------|--------------|----------|------------|---------|---------------|
| FSC           | -            | -        | -          | -       | -             |
| SSC           | -            | -        | -          | -       | -             |
| CD3           | PerCP        | 1:50     | SP34-2     | 552851  | BD Horizon    |
| CD4           | APC-H7       | 1:200    | SK3        | 641398  | BD            |
| CD8           | APC          | 1:200    | SK1        | 340584  | BD            |
| CD25          | BB515 (FITC) | 1:100    | 2A3        | 554467  | BD Horizon    |
| CD127         | BV650        | 1:100    | HIL-7R-M21 | 563225  | BD Horizon    |
| L/D           | FVS700       | 1:1000   | -          | 564997  | BD            |
| INF- $\gamma$ | PE-Cy7       | 1:100    | B27        | 557643  | BD pharmingen |
| TGF- $\beta$  | BV-421       | 1:100    | TW4-9E7    | 562962  | BD Horizon    |
| IL-10         | PE           | 1:100    | JES3-19F1  | 559330  | BD pharmingen |
| FoxP3         | PE-CFS594    | 1:100    | 236A/E7    | 563955  | BD Horizon    |

**Supplementary Table S2.** Amino acid sequences of SARS-CoV-2 N peptides.

| Peptide number | Amino acid start position | Sequence        |
|----------------|---------------------------|-----------------|
| 1              | 1                         | MSDNGPQNQRNAPRI |
| 2              | 5                         | GPQNQRNAPRITFGG |
| 3              | 9                         | QRNAPRITFGGPSDS |
| 4              | 13                        | PRITFGGPSDSTGSN |
| 5              | 17                        | FGGPSDSTGSNQNGE |
| 6              | 21                        | SDSTGSNQNGERSGA |
| 7              | 25                        | GSNQNGERSGARSKQ |
| 8              | 29                        | NGERSGARSKQRRPQ |
| 9              | 33                        | SGARSKQRRPQGLPN |
| 10             | 37                        | SKQRRPQGLPNNTAS |
| 11             | 41                        | RPQGLPNNTASWFTA |
| 12             | 45                        | LPNNTASWFTALTQH |
| 13             | 49                        | TASWFTALTQHGKED |
| 14             | 53                        | FTALTQHGKEDLKFP |
| 15             | 57                        | TQHGKEDLKFPRGQG |
| 16             | 61                        | KEDLKFPRGQGVPI  |
| 17             | 65                        | KFPRGQGVPIINTSS |
| 18             | 69                        | GQGVPIINTSSPDDQ |
| 19             | 73                        | PINTSSPDDQIGYY  |
| 20             | 77                        | NSSPDDQIGYYRRAT |
| 21             | 81                        | DDQIGYYRRATRRIR |
| 22             | 85                        | GYRRATRRIRGGDG  |
| 23             | 89                        | RATRRIRGGDGKMKD |
| 24             | 93                        | RIRGGDGKMKDLSR  |
| 25             | 97                        | GDGKMKDLSRWYFY  |
| 26             | 101                       | MKDLSRWYFYLYGT  |
| 27             | 105                       | SPRWYFYLYGTGPEA |

| Peptide number | Amino acid start position | Sequence        |
|----------------|---------------------------|-----------------|
| 28             | 109                       | YFYLLGTGPEAGLPY |
| 29             | 113                       | LGTGPEAGLPYGANK |
| 30             | 117                       | PEAGLPYGANKDGII |
| 31             | 121                       | LPYGANKDGIIWVAT |
| 32             | 125                       | ANKDGIIWVATEGAL |
| 33             | 129                       | GIIWVATEGALNTPK |
| 34             | 133                       | VATEGALNTPKDHIG |
| 35             | 137                       | GALNTPKDHIGTRNP |
| 36             | 141                       | TPKDHIGTRNPANNA |
| 37             | 145                       | HIGTRNPANNAIVL  |
| 38             | 149                       | RNPANNAIVLQLPQ  |
| 39             | 153                       | NNAAIVLQLPQGTTL |
| 40             | 157                       | IVLQLPQGTTLPKGF |
| 41             | 161                       | LPQGTTLPKGFYAEG |
| 42             | 165                       | TTLPKGFYAEGSRGG |
| 43             | 169                       | KGFYAEGSRGGSQAS |
| 44             | 173                       | AEGSRGGSQASSRSS |
| 45             | 177                       | RGGSQASSRSSRSR  |
| 46             | 181                       | QASSRSSRSRNSSR  |
| 47             | 185                       | RSSRSRNSSRNSTP  |
| 48             | 189                       | RSRNSSRNSTPGSSR |
| 49             | 193                       | SSRNSTPGSSRGTS  |
| 50             | 197                       | STPGSSRGTSARMA  |
| 51             | 201                       | SSRGTSARMAGNGG  |
| 52             | 205                       | TSPARMAGNGGDAAL |
| 53             | 209                       | RMAGNGGDAALALL  |
| 54             | 213                       | NGGDAALALLLDRL  |
| 55             | 217                       | AALALLLDRLNQLE  |
| 56             | 221                       | LLLDRLNQLESKMS  |
| 57             | 225                       | DRLNQLESKMSGKGQ |
| 58             | 229                       | QLESKMSGKGQQQQG |
| 59             | 233                       | KMSGKGQQQQGQTVT |
| 60             | 237                       | KGQQQQGQTVTKKSA |
| 61             | 241                       | QQGQTVTKKSAAEAS |
| 62             | 245                       | TVTKKSAAEASKKPR |
| 63             | 249                       | KSAAEASKKPRQKRT |
| 64             | 253                       | EASKKPRQKRTATKA |
| 65             | 257                       | KPRQKRTATKAYNVT |
| 66             | 261                       | KRTATKAYNVTQAFG |
| 67             | 265                       | TKAYNVTQAFGRRGP |
| 68             | 269                       | NVTQAFGRRGPEQTQ |
| 69             | 273                       | AFGRRGPEQTQGNFG |
| 70             | 277                       | RGPEQTQGNFGDQEL |
| 71             | 281                       | QTQGNFGDQELIRQG |
| 72             | 285                       | NFGDQELIRQGTQYK |

| Peptide number | Amino acid start position | Sequence        |
|----------------|---------------------------|-----------------|
| 73             | 289                       | QELIRQGTDYKHWPQ |
| 74             | 293                       | RQGTDYKHWPQIAQF |
| 75             | 297                       | DYKHWPQIAQFAPSA |
| 76             | 301                       | WPQIAQFAPSASAFF |
| 77             | 305                       | AQFAPSASAFFGMSR |
| 78             | 309                       | PSASAFFGMSRIGME |
| 79             | 313                       | AFFGMSRIGMEVTPS |
| 80             | 317                       | MSRIGMEVTPSGTWL |
| 81             | 321                       | GMEVTPSGTWLTYTG |
| 82             | 325                       | TPSGTWLTYTGAIKL |
| 83             | 329                       | TWLTYTGAIKLDDKD |
| 84             | 333                       | YTGAIKLDDKDPNFK |
| 85             | 337                       | IKLDDKDPNFKDQVI |
| 86             | 341                       | DKDPNFKDQVILLNK |
| 87             | 345                       | NFKDQVILLNKHIDA |
| 88             | 349                       | QVILLNKHIDAYKTF |
| 89             | 353                       | LNKHIDAYKTFPTE  |
| 90             | 357                       | IDAYKTFPTEPKKD  |
| 91             | 361                       | KTFPTEPKKDKKKK  |
| 92             | 365                       | PTEPKKDKKKKADET |
| 93             | 369                       | KKDKKKKADETQALP |
| 94             | 373                       | KKKADETQALPQRQK |
| 95             | 377                       | DETQALPQRQKKQQT |
| 96             | 381                       | ALPQRQKKQQTVTLL |
| 97             | 385                       | RQKKQQTVTLLPAAD |
| 98             | 389                       | QQTVTLLPAADLDDF |
| 99             | 393                       | TLLPAADLDDFSKQL |
| 100            | 397                       | AADLDDFSKQLQQSM |
| 101            | 401                       | DDFSKQLQQSMSSAD |
| 102            | 405                       | KQLQQSMSSADSTQA |

**Supplementary Table S3.** Amino acid sequences of SARS-CoV-2 S1 peptides.

| Peptide number | Amino acid start position | Sequence         |
|----------------|---------------------------|------------------|
| 1              | 1                         | MFVFLVLLPLVSSQC  |
| 2              | 6                         | VLLPLVSSQCVNLTT  |
| 3              | 11                        | VSSQCVNLTTTRTQLP |
| 4              | 16                        | VNLTTTRTQLPPAYTN |
| 5              | 21                        | RTQLPPAYTNSFTRG  |
| 6              | 26                        | PAYTNSFTRGVYYPD  |
| 7              | 31                        | SFTRGVYYPDKVFRS  |
| 8              | 36                        | VYYPDKVFRSSVLHS  |
| 9              | 41                        | KVFRSSVLHSTQDLF  |
| 10             | 46                        | SVLHSTQDLFLPFFS  |

| Peptide number | Amino acid start position | Sequence        |
|----------------|---------------------------|-----------------|
| 11             | 51                        | TQDLFLPFFSNVTWF |
| 12             | 56                        | LPFFSNVTWFHAIHV |
| 13             | 61                        | NVTWFHAIHVSGTNG |
| 14             | 66                        | HAIHVSGTNGTKRFD |
| 15             | 71                        | SGTNGTKRFDNPVLP |
| 16             | 76                        | TKRFDNPVLPFNDGV |
| 17             | 81                        | NPVLPFNDGVYFAST |
| 18             | 86                        | FNDGVYFASTEKSNI |
| 19             | 91                        | YFASTEKSNIIRGWI |
| 20             | 96                        | EKSNIIRGWIFGTTL |
| 21             | 101                       | IRGWIFGTTLDSKTQ |
| 22             | 106                       | FGTTLDSKTQSLIV  |
| 23             | 111                       | DSKTQSLIVNNATN  |
| 24             | 116                       | SLIVNNATNVVIKV  |
| 25             | 121                       | NNATNVVIKVCEFQF |
| 26             | 126                       | VVIKVCEFQFCNDPF |
| 27             | 131                       | CEFQFCNDPFLGVYY |
| 28             | 136                       | CNDPFLGVYYHKNNK |
| 29             | 141                       | LGVYYHKNNKSWMES |
| 30             | 146                       | HKNNKSWMESEFRVY |
| 31             | 151                       | SWMESEFRVYSSANN |
| 32             | 156                       | EFRVYSSANNCTFEY |
| 33             | 161                       | SSANNCTFEYVSQPF |
| 34             | 166                       | CTFEYVSQPFMDLE  |
| 35             | 171                       | VSQPFMDLEGKQGN  |
| 36             | 176                       | LMDLEGKQGNFKNLR |
| 37             | 181                       | GKQGNFKNLREFVFK |
| 38             | 186                       | FKNLREFVFKNIDGY |
| 39             | 191                       | EFVFKNIDGYFKIYS |
| 40             | 196                       | NIDGYFKIYSKHTPI |
| 41             | 201                       | FKIYSKHTPINLVRD |
| 42             | 206                       | KHTPINLVRDLPQGF |
| 43             | 211                       | NLVRDLPQGFSALEP |
| 44             | 216                       | LPQGFSALEPLVDLP |
| 45             | 221                       | SALEPLVDLPIGINI |
| 46             | 226                       | LVDLPIGINITRFQT |
| 47             | 231                       | IGINITRFQTLLALH |
| 48             | 236                       | TRFQTLLALHRSYLT |
| 49             | 241                       | LLALHRSYLTSGDSS |
| 50             | 246                       | RSYLTSGDSSSGWTA |
| 51             | 251                       | PGDSSSGWTAGAAAY |
| 52             | 256                       | SGWTAGAAAYYVGYL |
| 53             | 261                       | GAAAYYVGYLQPRTF |
| 54             | 266                       | YVGYLQPRTFLLKYN |
| 55             | 271                       | QPRTFLLKYNENGTI |

| Peptide number | Amino acid start position | Sequence         |
|----------------|---------------------------|------------------|
| 56             | 276                       | LLKYNENGTITDAVD  |
| 57             | 281                       | ENGTITDAVDCALDP  |
| 58             | 286                       | TDAVDCALDPLSETK  |
| 59             | 291                       | CALDPLSETKCTLKS  |
| 60             | 296                       | LSETKCTLKSFTVEK  |
| 61             | 301                       | CTLKSFTVEKGIYQT  |
| 62             | 306                       | FTVEKGIYQTSNFRV  |
| 63             | 311                       | GIYQTSNFRVQPTES  |
| 64             | 316                       | SNFRVQPTESIVRFP  |
| 65             | 321                       | QPTESIVRFPNITNL  |
| 66             | 326                       | IVRFPNITNLCPFGE  |
| 67             | 331                       | NITNLCPFGEVFNAT  |
| 68             | 336                       | CPFGEVFNATRFASV  |
| 69             | 341                       | VFNATRFASVYAWNR  |
| 70             | 346                       | RFASVYAWNRKRISN  |
| 71             | 351                       | YAWNRKRISNCSVADY |
| 72             | 356                       | KRISNCSVADYSVLYN |
| 73             | 361                       | CVADYSVLYNSASF   |
| 74             | 366                       | SVLYNSASFSTFKCY  |
| 75             | 371                       | SASFSTFKCYGVSP   |
| 76             | 376                       | TFKCYGVSPTKLNDL  |
| 77             | 381                       | GVSPTKLNDLCFTNV  |
| 78             | 386                       | KLNDLCFTNVYADSF  |
| 79             | 391                       | CFTNVYADSFVIRGD  |
| 80             | 396                       | YADSFVIRGDEVIRQI |
| 81             | 401                       | VIRGDEVIRQIAPGQT |
| 82             | 406                       | EVIRQIAPGQTGKIAD |
| 83             | 411                       | APGQTGKIADYNYKL  |
| 84             | 416                       | GKIADYNYKLPPDDFT |
| 85             | 421                       | YNYKLPPDDFTGCVIA |
| 86             | 426                       | PPDDFTGCVIAWNSNN |
| 87             | 431                       | GCVIAWNSNNLDSKV  |
| 88             | 436                       | WNSNNLDSKVGGNYN  |
| 89             | 441                       | LDSKVGGNYNYLYRL  |
| 90             | 446                       | GGNYNYLYRLFRKSN  |
| 91             | 451                       | YLYRLFRKSNLKPFE  |
| 92             | 456                       | FRKSNLKPFERDIST  |
| 93             | 461                       | LKPFERDISTEIQQA  |
| 94             | 466                       | RDISTEIQAGSTPC   |
| 95             | 471                       | EIQAGSTPCNGVEG   |
| 96             | 476                       | GSTPCNGVEGFNCYF  |
| 97             | 481                       | NGVEGFNCYFPLQSY  |
| 98             | 486                       | FNCYFPLQSYGFQPT  |
| 99             | 491                       | PLQSYGFQPTNGVGY  |
| 100            | 496                       | GFQPTNGVGYQPYRV  |

| Peptide number | Amino acid start position | Sequence          |
|----------------|---------------------------|-------------------|
| 101            | 501                       | NGVGYPYRVVLSF     |
| 102            | 506                       | QPYRVVLSFELLHA    |
| 103            | 511                       | VVLSFELLHAPATVC   |
| 104            | 516                       | ELLHAPATVCGPKKS   |
| 105            | 521                       | PATVCGPKKSTNLVK   |
| 106            | 526                       | GPKKSTNLVKNKCVN   |
| 107            | 531                       | TNLVKNKCVNFNFNNG  |
| 108            | 536                       | NKCVNFNFNGLTGTG   |
| 109            | 541                       | FNFNGLTGTGVLTES   |
| 110            | 546                       | LTGTGVLTESNKKFL   |
| 111            | 551                       | VLTESNKKFLPFQQF   |
| 112            | 556                       | NKKFLPFQQFGRDIA   |
| 113            | 561                       | PFQQFGRDIADTTDA   |
| 114            | 566                       | GRDIADTTDAVRDPQ   |
| 115            | 571                       | DTTDAVRDPQTLEIL   |
| 116            | 576                       | VRDPQTLEILDITPC   |
| 117            | 581                       | TLEILDITPCSFGGV   |
| 118            | 586                       | DITPCSFGGVSVITP   |
| 119            | 591                       | SFGGVSVITPGTNTS   |
| 120            | 596                       | SVITPGTNTSNQVAV   |
| 121            | 601                       | GTNTSNQVAVLYQDV   |
| 122            | 606                       | NQVAVLYQDVNCTEV   |
| 123            | 611                       | LYQDVNCTEVPVAIH   |
| 124            | 616                       | NCTEVPVAIHADQLT   |
| 125            | 621                       | PVAIHADQLTPTWRV   |
| 126            | 626                       | ADQLTPTWRVYSTGS   |
| 127            | 631                       | PTWRVYSTGSNVFQT   |
| 128            | 636                       | YSTGSNVFQTRAGCL   |
| 129            | 641                       | NVFQTRAGCLIGA EH  |
| 130            | 646                       | RAGCLIGA EHVNN SY |
| 131            | 651                       | IGA EHVNN SYECDIP |
| 132            | 656                       | VNNSYECDIPIGAGI   |
| 133            | 661                       | ECDIPIGAGICASYQ   |
| 134            | 666                       | IGAGICASYQTQ TNS  |
